# Supplementary material for: Carboxyl-containing microporous organic nanotube networks as a platform for Pd catalysts
Source: Royal Society of Chemistry journal article supplement (doi:10.1039/c6ra05753e), 2016-01-01

## Supporting Information

### Carboxyl-containing microporous organic nanotube networks as a platform for Pd catalysts

Yang Xu, Tianqi Wang, Zidong He, Aiqing Zhong and Kun Huang\*

*School of Chemistry and Molecular Engineering, East China Normal University, 500  
N, Dongchuan Road, Shanghai, 200241, P. R. China.*

E-mail: [khuang@chem.ecnu.edu.cn](mailto:khuang@chem.ecnu.edu.cn),

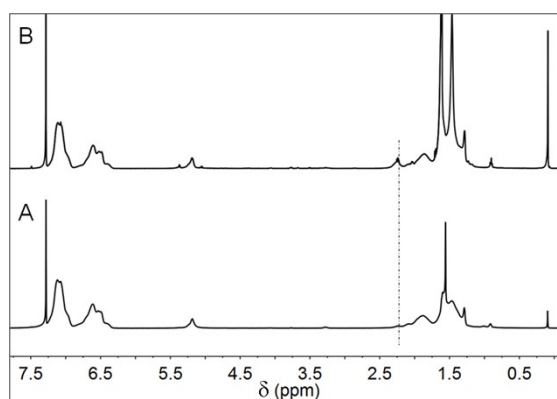

**Fig. S1** <sup>1</sup>H NMR spectra of (A) PGM-g-(PLA-b-PS) and (B) PGM-g-(PLA-b-PtBA-b-PS).

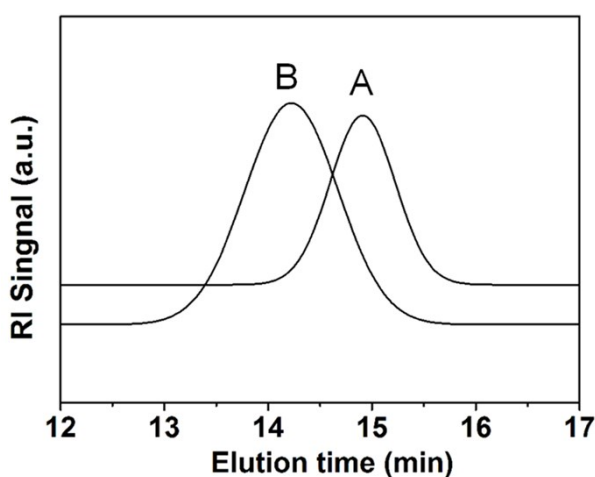

**Fig. S2** GPC traces recorded for (A) PGM-g-(PLA-b-PS) and (B) PGM-g-(PLA-b-PtBA-b-PS).

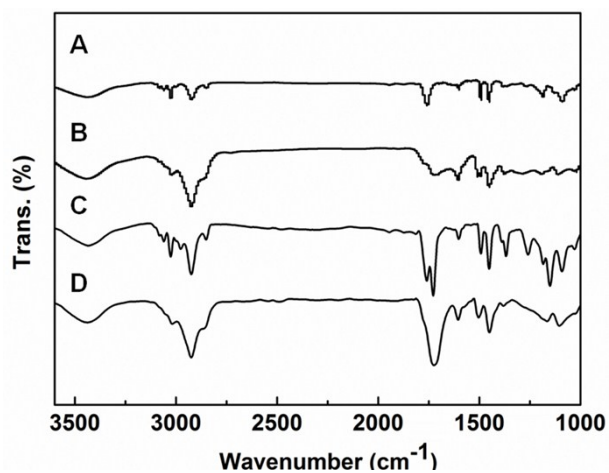

**Fig. S3** FTIR of PGM-g-(PLA-b-PS) (A) before cross-linking and (B) after cross-linking with hydrolysis; PGM-g-(PLA-b-PtBA-b-PS) (C) before cross-linking and (D) after cross-linking with hydrolysis.

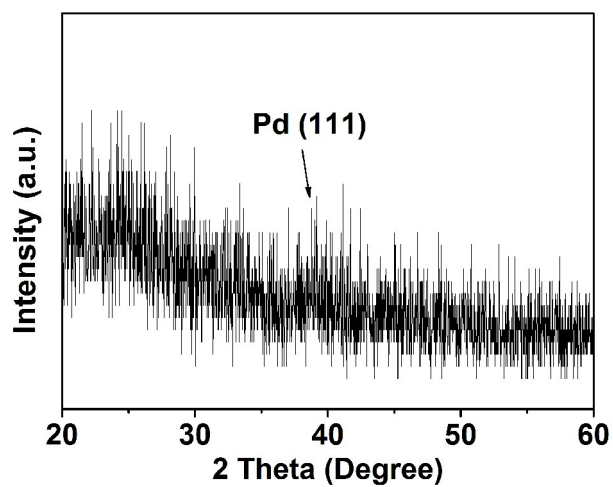

**Fig. S4** XRD pattern of Pd@MONNs-1.

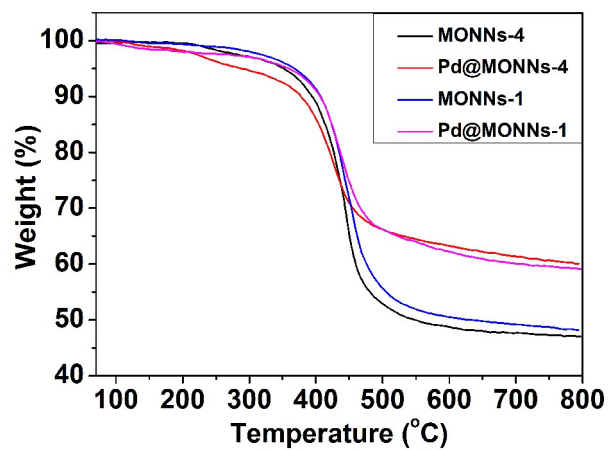

**Fig. S5** TGA thermograms of MONNs-4 (black line), Pd@MONNs-4 (red line), MONNs-1 (blue line) and Pd@MONNs-1 (pink line).

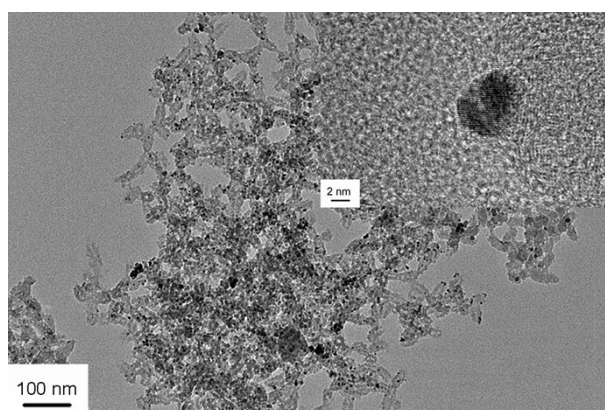

**Fig. S6** TEM images for Pd@MONNs-1 after the eight runs.

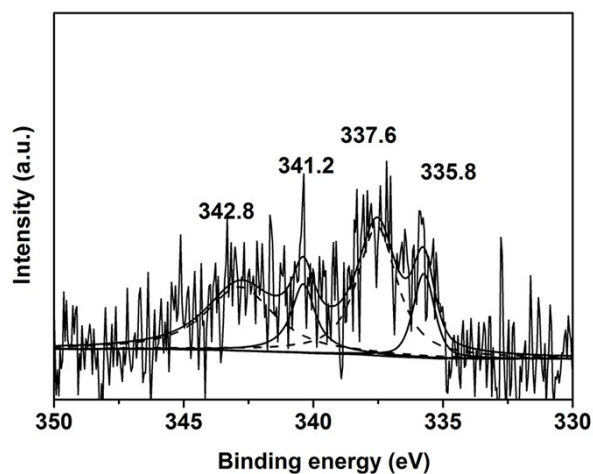

**Fig. S7** XPS spectra of Pd species for Pd@MONNs-1 after the eight runs.

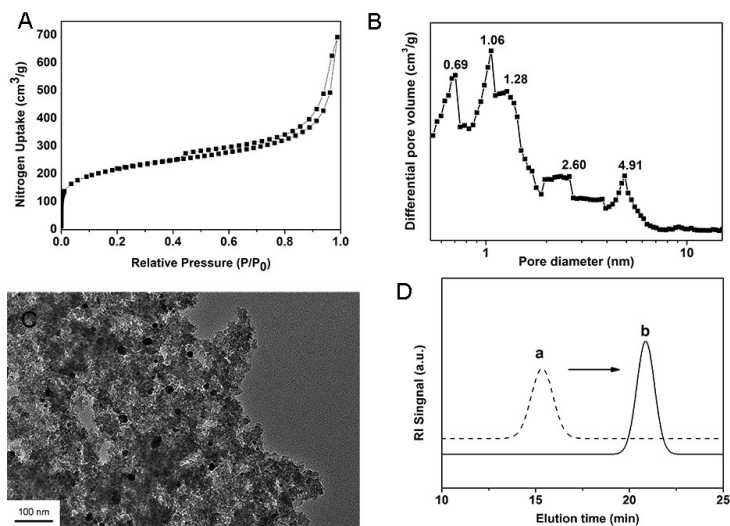

**Fig. S8** (A) Nitrogen adsorption-desorption isotherms , (B) NLDFT pore size distributions and (C) TEM image of Pd@MOP. (D) GPC traces recorded for the transformation from (a) PGM-g-(PLA-b-PS) to (b) PS-COONa.

**Analytical data for compounds of the Suzuki-Miyaura coupling reactions.**

**Biphenyl (Entry 8, Table 1):**

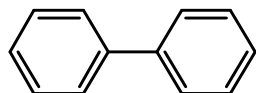

**<sup>1</sup>H NMR (500 MHz, CDCl<sub>3</sub>):** δ 7.61 (d, J = 7.5 Hz, 4H); 7.45 (t, J = 7.5 Hz, 4H); 7.35 (tt, 2H).

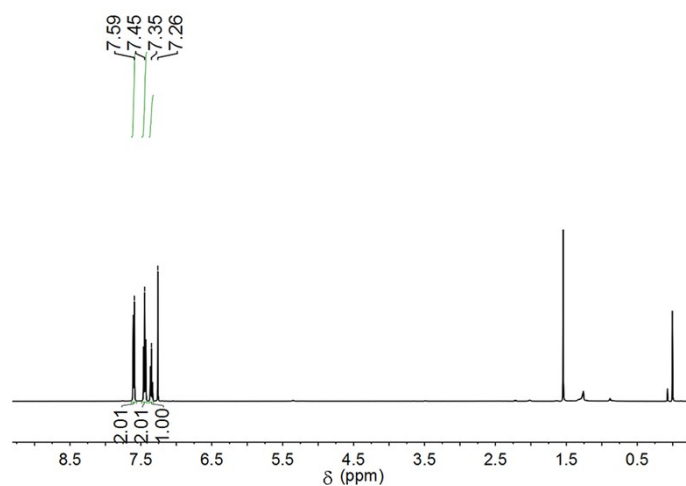

**4-Methoxybiphenyl (Entry 9, Table 1):**

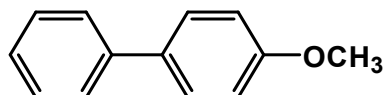

**<sup>1</sup>H NMR (500 MHz, CDCl<sub>3</sub>):** δ 7.55 (m, 4H), δ 7.42 (m, 2H), δ 7.31 (t, J = 7.5 Hz, 1H), δ 6.98 (d, J = 9.0 Hz, 2H), δ 3.86 (s, 3H, CH<sub>3</sub>).

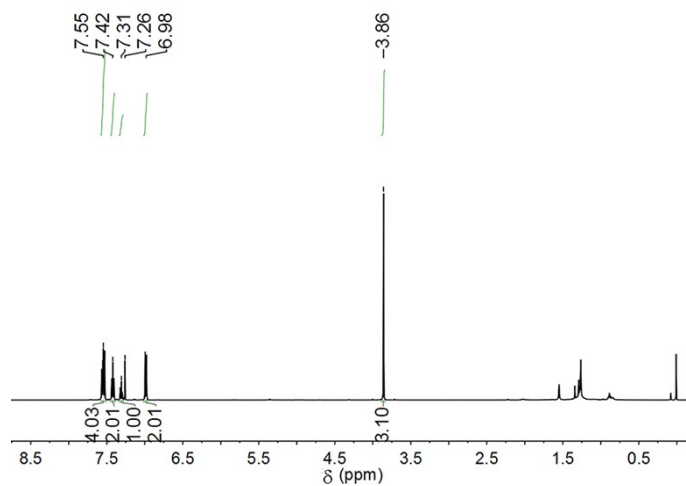

Supplement: c6ra05753e1.pdf [file c6ra05753e1.pdf]
